# Supplementary material for: The RNA chaperone Hfq is essential for the virulence of Salmonella typhimurium
Source: PubMed Central journal article supplement (PMC1810395; doi:10.1111/j.1365-2958.2006.05489.x), 2007-01

# Figure S5

Sittka *et al.*, 2006

**A**

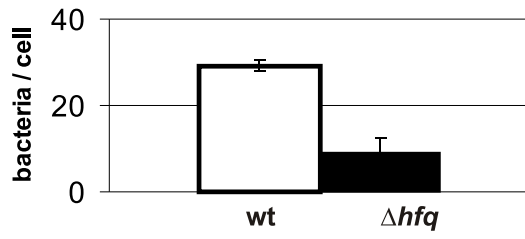

**B**

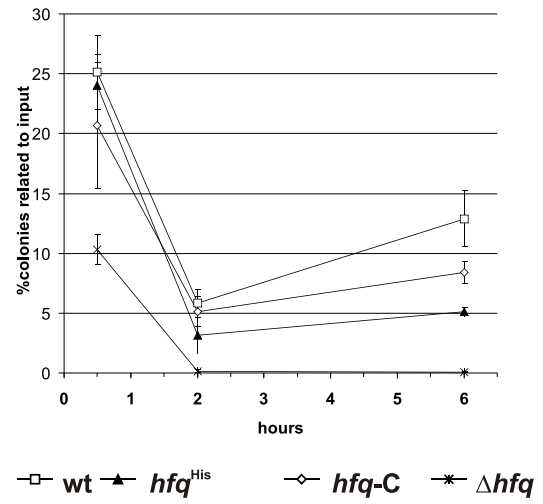

Supplement: MMI5489FigS5.pdf [file MMI5489FigS5.pdf]
